# Supplementary material for: A Novel Classification Algorithm Based on the Synergy Between Dynamic Clustering with Adaptive Distances and K-Nearest Neighbors
Source: Springer Nature journal article supplement (doi:10.1007/s00357-024-09471-5), 2024-05-11
Supplement: MOESM1 [file 27081534]

## Supplementary material

### Proof of the problem P1

If we set Eq. 11 to zero, we have

$$\sum_{i=1}^{n_k} u_{gip} [(x_{ij} - z_{gpj})(z_{gpj} - z_{gGj})^2 + (z_{gpj} - z_{gGj})(x_{ij} - z_{gpj})^2] = 0 \quad (27)$$

Which gives:

$$\sum_{i=1}^{n_g} u_{gip} (x_{ij} - z_{gpj})(z_{gpj} - z_{gGj})(z_{gpj} - z_{gGj} + x_{ij} - z_{gpj}) = 0 \quad (28)$$

If  $z_{gpj} \neq z_{gGj}$ , we have:

$$z_{kpj} = \frac{\sum_{i=1}^{n_g} u_{gip} x_{ij} (x_{ij} - z_{gGj})}{\sum_{i=1}^{n_g} u_{gip} (x_{ij} - z_{gGj})} \quad (29)$$

Constantly necessary and sufficient condition for this equality to be realizable is when:

$$x_{min} \leq z_{gpj} \leq x_{max} \quad (30)$$

where:

$x_{min} = \min_{i=1, \dots, n} u_{gip} x_{ij}$  and  $x_{max} = \max_{i=1, \dots, n} u_{gip} x_{ij}$  for the subgroup  $p$  from the

apriori group  $K$

Suppose that  $\sum_{i=1}^{n_g} u_{gip}(x_{ij} - z_{gGj}) > 0$  the inequality becomes:

$$x_{min} \sum_{i=1}^{n_g} u_{gip}(x_{ij} - z_{gGj}) \stackrel{(1)}{\leq} \sum_{i=1}^{n_g} u_{gip} x_{ij} (x_{ij} - z_{gGj}) \stackrel{(2)}{\leq} x_{max} \sum_{i=1}^{n_g} u_{gip}(x_{ij} - z_{gGj}) \quad (31)$$

For the inequality (1):

$$\sum_{i=1}^{n_g} u_{kip} x_{ij} (x_{ij} - z_{gGj}) \geq x_{min} \sum_{i=1}^{n_g} u_{gip} (x_{ij} - z_{gGj}) \quad (32)$$

We get:

$$z_{kGj} \leq \frac{\sum_{i=1}^{n_g} u_{gip} x_{ij}^2 - x_{min} \sum_{i=1}^{n_g} u_{gip} x_{ij}}{\sum_{i=1}^{n_g} u_{gip} x_{ij} - x_{min} n_g} \quad (33)$$

$$z_{gGj} \leq \frac{\sum_{i=1}^{n_g} u_{gip} x_{ij}^2 - x_{min} \sum_{i=1}^{n_g} u_{gip} x_{ij}}{n_g (\bar{X}_{gp} - x_{min})} \quad (34)$$

For the inequality (2):

$$\sum_{i=1}^{n_g} u_{gip} x_{ij} (x_{ij} - z_{gGj}) \leq x_{max} \sum_{i=1}^{n_g} u_{gip} (x_{ij} - z_{gGj}) \quad (35)$$

We get:

$$z_{gGj} \leq \frac{x_{max} n_g \bar{X}_{gp} - \sum_{i=1}^{n_g} u_{gip} x_{ij}^2}{n_g (x_{max} - \bar{X}_{gp})} \quad (36)$$

So:

$$z_{gG_j} \leq \min \left\{ \frac{\sum_{i=1}^{n_g} u_{gip} x_{ij}^2 - x_{min} \sum_{i=1}^{n_g} u_{gip} x_{ij}}{n_g (\bar{X}_{gp} - x_{min})}, \frac{x_{max} n_g \bar{X}_{gp} - \sum_{i=1}^{n_g} u_{gip} x_{ij}^2}{n_g (x_{max} - \bar{X}_{gp})} \right\} \quad (37)$$

Suppose that  $\sum_{i=1}^{n_g} u_{gip} (x_{ij} - z_{gG_j}) < 0$  the inequality becomes:

$$x_{max} \sum_{i=1}^{n_g} u_{gip} (x_{ij} - z_{gG_j}) \stackrel{(1)}{\leq} \sum_{i=1}^{n_g} u_{gip} x_{ij} (x_{ij} - z_{gG_j}) \stackrel{(2)}{\leq} x_{min} \sum_{i=1}^{n_g} u_{gip} (x_{ij} - z_{gG_j}) \quad (38)$$

For the inequality (1):

$$\sum_{i=1}^{n_g} u_{gip} x_{ij} (x_{ij} - z_{gG_j}) \geq x_{max} \sum_{i=1}^{n_g} u_{gip} (x_{ij} - z_{gG_j}) \quad (39)$$

We get:

$$z_{gG_j} \geq \frac{x_{max} n_g \bar{X}_{gp} - \sum_{i=1}^{n_g} u_{gip} x_{ij}^2}{n_g (x_{max} - \bar{X}_{gp})} \quad (40)$$

For the inequality (2):

$$\sum_{i=1}^{n_g} u_{gip} x_{ij} (x_{ij} - z_{gG_j}) \leq x_{min} \sum_{i=1}^{n_g} u_{gip} (x_{ij} - z_{gG_j}) \quad (41)$$

We get:

$$z_{gG_j} \geq \frac{\sum_{i=1}^{n_g} u_{kip} x_{ij}^2 - x_{min} \sum_{i=1}^{n_g} u_{gip} x_{ij}}{\sum_{i=1}^{n_g} u_{gip} x_{ij} - x_{min} n_g} \quad (42)$$

$$z_{gG_j} \geq \frac{\sum_{i=1}^{n_g} u_{gip} x_{ij}^2 - x_{min} \sum_{i=1}^{n_g} u_{gip} x_{ij}}{n_g (\bar{X}_{gp} - x_{min})} \quad (43)$$

So:

$$z_{gGj} \geq \max \left\{ \frac{x_{max} n_g \bar{X}_{gp} - \sum_{i=1}^{n_g} u_{gip} x_{ij}^2}{n_g (x_{max} - \bar{X}_{gp})}, \frac{\sum_{i=1}^{n_g} u_{gip} x_{ij}^2 - x_{min} \sum_{i=1}^{n_g} u_{gip} x_{ij}}{n_g (\bar{X}_{gp} - x_{min})} \right\} \quad (44)$$

To assure that  $z_{gGj}$  is a solution for Eq. 11 it suffices to verify that  $z_{gGj}$  meets the following conditions:

$$\left\{ \begin{array}{l} z_{gGj} \leq \min \left\{ \frac{\sum_{i=1}^{n_g} u_{gip} x_{ij}^2 - x_{min} \sum_{i=1}^{n_g} u_{gip} x_{ij}}{n_g (\bar{X}_{gp} - x_{min})}, \frac{x_{max} n_g \bar{X}_{gp} - \sum_{i=1}^{n_g} u_{gip} x_{ij}^2}{n_g (x_{max} - \bar{X}_{gp})} \right\} \quad \text{if} \\ \sum_{i=1}^{n_g} u_{gip} (x_{ij} - z_{gGj}) > 0 \\ z_{gGj} \geq \max \left\{ \frac{x_{max} n_g \bar{X}_{gp} - \sum_{i=1}^{n_g} u_{gip} x_{ij}^2}{n_g (x_{max} - \bar{X}_{gp})}, \frac{\sum_{i=1}^{n_g} u_{gip} x_{ij}^2 - x_{min} \sum_{i=1}^{n_g} u_{gip} x_{ij}}{n_g (\bar{X}_{gp} - x_{min})} \right\} \quad \text{if} \\ \sum_{i=1}^{n_g} u_{gip} (x_{ij} - z_{gGj}) < 0 \end{array} \right. \quad (45)$$

## Description of the Data Generation Processes

This section aims to offer precise and clear definitions for each DGP, ensuring understanding and clarity. It is essential to ensure a comprehensive understanding of each DGP in order to facilitate accurate interpretation and analysis of the generated data:

**DGP 1:** Two clusters were created by utilizing independent Gaussian random variables. Cluster 1 has a mean value of 0 and a covariance matrix of  $0.8^2 I_{40}$ , where  $I_{40}$  represents the identity matrix of size 40. Cluster 2 shows a mean of 0.1 and a covariance matrix of  $0.9^2 I_{40}$ .

**DGP 2:** Two distinct clusters were created using independent random variables that had different distributions. Cluster 1 is formed from a

Lognormal distribution that produces samples from a conventional normal distribution with a mean of 0 and a covariance matrix of  $I_{45}$ . Cluster 2 is formed by applying the Pareto distribution with a shape parameter of 2.62.

**DGP 3:** Three clusters were created by utilizing independent Gaussian random variables. Cluster 1 has a mean value of 0 and a covariance matrix of  $0.7^2 I_{40}$ . Cluster 2 has a mean of 0.1 and a covariance matrix of  $0.6^2 I_{40}$ , while cluster 3 has a mean of 0.7 and a covariance matrix of  $0.5^2 I_{40}$ .

**DGP 4:** Three distinct clusters were generated by using independent random variables that had different distributions. Cluster 1 is generated when samples from a Chi-Square distribution with a degree of freedom of 2 are drawn from a Lognormal distribution. Cluster 2 is produced when an exponential distribution is utilized to represent the intervals between events in a Poisson process with a scale of 1. Conversely, cluster 3 is generated using a uniform distribution, which yields values that are uniformly distributed within the range of 0 to 1.5.

**DGP 5:** Four clusters were created by utilizing independent Gaussian random variables. Cluster 1 has a mean value of 0 and a covariance matrix of  $I_{40}$ . Cluster 2 has a mean of 0.5 and a covariance matrix of the identity matrix with dimensions 40. Cluster 3 has a mean of 1 and a covariance matrix of the same identity matrix. Cluster 4 has a mean of 1.5 and a covariance matrix of  $1.5^2 I_{40}$ .

**DGP 6:** Five distinct clusters were created using independently generated random variables with different distributions. Specifically, the first cluster

was derived from non-central t-distributions with 25 degrees of freedom and a non-centrality parameter of 1.5. The second cluster was produced from gamma distributions, represented by the symbol  $Gam(3, 1.2)$ , where 3 and 1.2 indicate the shape and rate parameters, respectively. The third cluster was formed using a uniform distribution over the continuous interval between 1 and 5. The fourth cluster was composed of independent Gaussian random variables with a mean of  $-1$  and a covariance matrix of  $1.5^2 I_{30}$ . Finally, the fifth cluster formed from the Gaussian distribution of mean 2 and a covariance matrix of  $2^2 I_{30}$ .

**Table 4:** Specifications of DGPs in the Simulation Study. N: denotes the number of classes, p: denotes the number of variables, and n: denotes the number of observations.

|      | N | p  | Distributions                        | Clusters size                                        | n    |
|------|---|----|--------------------------------------|------------------------------------------------------|------|
| DGP1 | 2 | 40 | Gaussians                            | (300, 250)                                           | 550  |
| DGP2 | 2 | 45 | Lognormal, Pareto                    | (500, 500)                                           | 1000 |
| DGP3 | 3 | 30 | Gaussians                            | (200, 400, 300)                                      | 900  |
| DGP4 | 3 | 45 | Chi-Square, Exponential, Uniform     | (500, 500, 500)                                      | 1500 |
| DGP5 | 4 | 27 | Multi-variate Gaussian distributions | (350, 200, 300, 250)                                 | 1100 |
| DGP6 | 5 | 30 | Non-central uniform, Gaussians       | t-distributions, Gamma and (250, 200, 250, 200, 200) | 1100 |

## Analysis of classification accuracy on simulated data for different values of $K$

In our main paper, we examine the classification effectiveness of the DC-KNN techniques by varying the value of  $K$ , particularly focusing on the classification accuracy with simulated datasets. As detailed in Subsection 4.2 of the main paper,  $K$  ranges from 1 to 20, increasing incrementally by 1. We discuss the classification accuracy for various  $K$  values and illustrate these findings

in Figure 4. Our analysis shows that DC-KNN2's classification accuracy is notably impacted by the different  $K$  values, achieving better results with smaller  $K$  values, which remain constant for larger  $K$ . This behavior aligns with the phenomenon where  $K$  exceeds the sum of apriori class subgroups. Moreover, we found that DC-KNN1 consistently outperforms traditional KNN and Kmeans-KNN across all  $K$  values, underscoring the beneficial impact of DC's new objective function on classifier performance. The determination of optimal subgroup numbers in our proposed method is data-dependent, as further elaborated in our study.

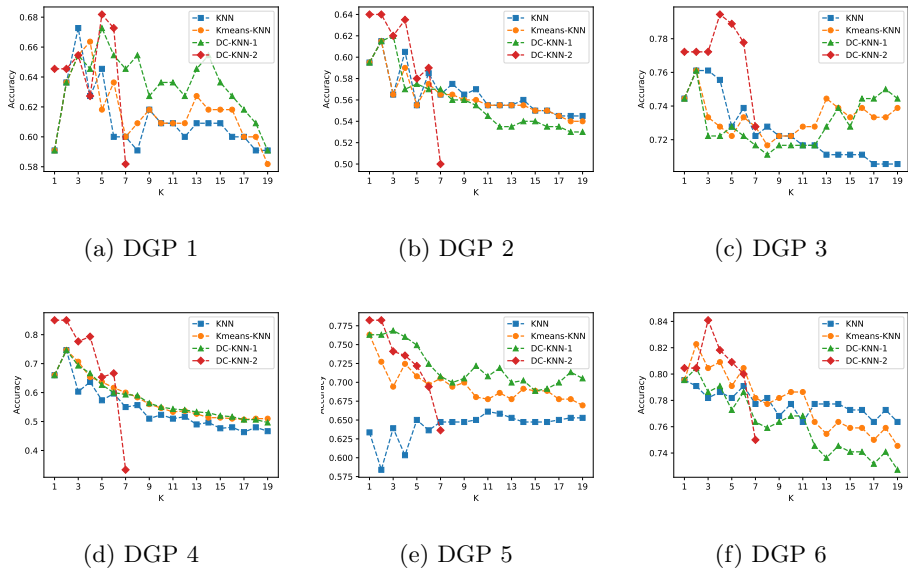

**Fig. 4:** The classification accuracy for each method on the simulated datasets with varying  $K$  values
